# Supplementary material for: Early hearing detection and intervention (EHDI) programmes for infants and young children in low-income and middle-income countries in Asia: a systematic review
Source: PubMed Central journal article supplement — BMJ Paediatr Open. 2023 Jan 31;7(1):e001752. doi: 10.1136/bmjpo-2022-001752 (PMC9890799; doi:10.1136/bmjpo-2022-001752), 2023-01-31
Supplement: bmjpo-2022-001752supp001.pdf [file bmjpo-2022-001752supp001.pdf]

**Supplementary table 1A: Quality appraisal for cross sectional studies using JBI tool for cross sectional studies**

| <b>Author and Year</b>     | <b>Were the criteria for inclusion in the sample clearly defined?</b> | <b>Were the study subjects and the setting described in detail?</b> | <b>Was the exposure measured in a valid and reliable way?</b> | <b>Were objective, standard criteria used for measurement of the condition?</b> | <b>Were confounding factors identified?</b> | <b>Were strategies to deal with confounding factors stated?</b> | <b>Were the outcomes measured in a valid and reliable way?</b> | <b>Was appropriate statistical analysis used?</b> |
|----------------------------|-----------------------------------------------------------------------|---------------------------------------------------------------------|---------------------------------------------------------------|---------------------------------------------------------------------------------|---------------------------------------------|-----------------------------------------------------------------|----------------------------------------------------------------|---------------------------------------------------|
| Biswas et al., 2012        | Yes                                                                   | Yes                                                                 | NA                                                            | Yes                                                                             | No                                          | NA                                                              | Yes                                                            | Yes                                               |
| Paul et al.,2011           | Yes                                                                   | Yes                                                                 | NA                                                            | Yes                                                                             | No                                          | NA                                                              | Yes                                                            | Yes                                               |
| Mishra et al., 2013        | Yes                                                                   | Yes                                                                 | NA                                                            | Yes                                                                             | No                                          | NA                                                              | Yes                                                            | No                                                |
| Ramesh et al., 2012        | Yes                                                                   | Yes                                                                 | No                                                            | Yes                                                                             | Yes                                         | Yes                                                             | Yes                                                            | Yes                                               |
| Kumar et al.,2015          | Yes                                                                   | Yes                                                                 | NA                                                            | Yes                                                                             | No                                          | NA                                                              | Yes                                                            | Yes                                               |
| Gupta et al.,2015          | Yes                                                                   | Yes                                                                 | NA                                                            | Yes                                                                             | No                                          | NA                                                              | Yes                                                            | Yes                                               |
| Vignesh et al.,2015        | Yes                                                                   | Yes                                                                 | NA                                                            | Yes                                                                             | No                                          | NA                                                              | Yes                                                            | Yes                                               |
| Vishwakarma et al.,2015    | Yes                                                                   | Yes                                                                 | NA                                                            | Yes                                                                             | No                                          | NA                                                              | Yes                                                            | Yes                                               |
| Paul et al.,2016           | Yes                                                                   | Yes                                                                 | NA                                                            | Yes                                                                             | No                                          | NA                                                              | Yes                                                            | NA                                                |
| Sharma et al., 2018        | No                                                                    | Yes                                                                 | NA                                                            | Yes                                                                             | No                                          | Na                                                              | Yes                                                            | Yes                                               |
| Kumar et al.,2016*         | Yes                                                                   | Yes                                                                 | NA                                                            | Yes                                                                             | No                                          | NA                                                              | Yes                                                            | Yes                                               |
| Sachdeva & Sao et al.,2017 | Yes                                                                   | Yes                                                                 | Yes                                                           | Yes                                                                             | No                                          | NA                                                              | Yes                                                            | Yes                                               |
| Swain et al.,2017          | Yes                                                                   | Yes                                                                 | Yes                                                           | Yes                                                                             | No                                          | No                                                              | Yes                                                            | Yes                                               |
| Bhat et al.,2018           | Yes                                                                   | Yes                                                                 | Yes                                                           | Yes                                                                             | No                                          | NA                                                              | Yes                                                            | Yes                                               |
| Bishnoi et al.,2018        | Yes                                                                   | Yes                                                                 | NA                                                            | Yes                                                                             | No                                          | NA                                                              | Yes                                                            | Yes                                               |

|                            |     |     |     |     |    |    |     |     |
|----------------------------|-----|-----|-----|-----|----|----|-----|-----|
| Parab et al.,2018 *        | Yes | Yes | NA  | Yes | No | NA | Yes | Yes |
| Jacob et al.,2020          | Yes | Yes | NA  | Yes | No | NA | Yes | Yes |
| Nishad et al.,2020         | Yes | Yes | NA  | Yes | No | No | Yes | Yes |
| Zhang et al., 2012         | Yes | Yes | NA  | Yes | No | No | No  | Yes |
| Tobe et al.,2013*          | Yes | Yes | NA  | Yes | No | NA | Yes | Yes |
| Chen et al.,2012           | Yes | Yes | NA  | Yes | No | NA | Yes | Yes |
| Shang et al.,2016          | Yes | Yes | NA  | Yes | No | NA | Yes | YEs |
| Wenjin et al., 2018        | Yes | Yes | NA  | Yes | No | NA | Yes | Yes |
| Dai et al.,2019            | Yes | YEs | NA  | Yes | No | NA | Yes | Yes |
| Zeng et al., 2020          | Yes | Yes | Yes | Yes | NA | NA | Yes | Yes |
| Wen et al., 2020 *         | Yes | Yes | NA  | yes | No | NA | Yes | Yes |
| Guo et al., 2020           | Yes | Yes | Yes | Yes | No | NA | Yes | Yes |
| Guomei et al.,2022         | Yes | Yes | NA  | Yes | No | NA | No  | Yes |
| Ahmad et al.,2011          | Yes | Yes | NA  | Yes | No | NA | Yes | Yes |
| <b>Wong et al.,2020</b>    | Yes | Yes | Yes | Yes | No | NA | Yes | Yes |
| Tungvachirakul et al.,2011 | Yes | Yes | NA  | Yes | No | NA | Yes | Yes |
| Poonual et al.,2017        | Yes | Yes | NA  | Yes | No | NA | Yes | Yes |
| Poonual et al., 2017b      | Yes | Yes | Yes | Yes | No | NA | Yes | Yes |
| Pitathawatchai et al.,2019 | Yes | Yes | Yes | Yes | No | Na | Yes | Yes |
| Ray et al.,2021            | Yes | Yes | NA  | Yes | No | NA | Yes | Yes |
| Mazlan et al.,2022         | Yes | Yes | NA  | Yes | No | NA | Yes | Yes |

|                               |     |     |     |     |    |    |     |     |
|-------------------------------|-----|-----|-----|-----|----|----|-----|-----|
| Shameem et al., 2022          | Yes | Yes | NA  | Yes | No | NA | Yes | Yes |
| Khaimook et al.,2022          | Yes | Yes | NA  | Yes | No | NA | Yes | Yes |
| Sennaroglu & Akmese, 2011     | Yes | Yes | NA  | Yes | No | NA | Yes | Yes |
| Ulusoy et al.,2014            | yes | Yes | NA  | Yes | No | NA | Yes | Yes |
| Kemaloğlu et al., 2016        | Yes | Yes | NA  | Yes | No | No | Yes | Yes |
| Yorulmaz et al., 2017         | Yes | Yes | Yes | Yes | No | NA | Yes | Yes |
| Ozturk et al.,2017            | Yes | Yes | NA  | Yes | No | No | Yes | Yes |
| Hamdi, 2018                   | Yes | Yes | NA  | Yes | No | No | Yes | Yes |
| Yücel et al., 2019            | Yes | Yes | NA  | Yes | No | NA | Yes | Yes |
| Arslan et al., 2013           | Yes | Yes | Yes | Yes | No | NA | Yes | Yes |
| Çıkrıkçı et al., 2020*        | Yes | Yes | Yes | Yes | No | NA | Yes | Yes |
| Arjmandi et al., 2012         | Yes | Yes | No  | Yes | No | NA | Yes | Yes |
| Islami et al.,2013            | Yes | Yes | Yes | Yes | No | NA | Yes | Yes |
| Firoozbakht et al.,2014       | Yes | Yes | NA  | Yes | No | NA | Yes | Yes |
| Zahed et al., 2014*           | Yes | Yes | NA  | Yes | No | NA | Yes | Yes |
| Farhat et al., 2014           | Yes | Yes | No  | Yes | No | NA | Yes | Yes |
| Haghshenas et al., 2014       | Yes | Yes | NA  | Yes | No | NA | Yes | Yes |
| Baradaranfar et al., 2014     | Yes | Yes | Yes | Yes | No | NA | Yes | Yes |
| Azizi et al., 2016            | Yes | Yes | NA  | Yes | No | NA | Yes | Yes |
| Tajik & Ahmadpour-Kacho, 2016 | Yes | Yes | NA  | Yes | No | NA | Yes | YEs |
| Saki et al.,2017              | Yes | Yes | NA  | Yes | No | NA | Yes | Yes |

|                           |     |     |     |     |     |     |     |     |
|---------------------------|-----|-----|-----|-----|-----|-----|-----|-----|
| Tuli et al.,2012          | Yes | Yes | No  | Yes | Yes | No  | Yes | Yes |
| Chadha et al., 2013       | Yes | Yes | NA  | No  | Yes | Yes | Yes | Yes |
| Ramkumar et al.,2018      | Yes | Yes | NA  | Yes | No  | NA  | Yes | Yes |
| Ramkumar et al.,2019      | Yes | Yes | NA  | Yes | No  | NA  | Yes | Yes |
| Verma et al.,2022         | Yes | Yes | NA  | Yes | No  | NA  | Yes | Yes |
| Shekhar et al., 2020      | Yes | Yes | Yes | Yes | Yes | No  | Yes | Yes |
| Lu et al.,2011            | Yes | Yes | Yes | Yes | No  | No  | Yes | Yes |
| Chen et al.,2013          | Yes | Yes | NA  | Yes | No  | NA  | Yes | Yes |
| Wu et al.,2014            | Yes | Yes | NA  | No  | No  | NA  | Yes | Yes |
| Kam et al.,2014           | Yes | YES | NA  | Yes | NA  | NA  | YES | YES |
| Tokgöz-Yılmaz et al.,2013 | Yes | Yes | NA  | Yes | No  | NA  | Yes | Yes |
| Kaplama et al.,2020       | Yes | Yes | Yes | Yes | No  | NA  | Yes | Yes |
| TarviEslami et al.,2017   | Yes | Yes | NA  | Yes | No  | NA  | Yes | Yes |
| Jalali et al.,2020        | Yes | Yes | Yes | No  | No  | NA  | Yes | Yes |
| Pilka et al.,2016         | No  | Yes | NA  | Yes | No  | NA  | Yes | Yes |
| Alaqrabawi et al.,2016    | Yes | Yes | NA  | Yes | No  | NA  | Yes | Yes |
| Al-Obeidy et al.,2019     | No  | Yes | NA  | No  | No  | NA  | Yes | Yes |

Supplementary table 1B: Quality appraisal for cohort studies using JBI tool for cohort study

| Author & year       | Were the two groups similar and recruited from the same population? | Were the exposures measured similarly to assign people to both exposed and unexposed groups? | Was the exposure measured in a valid and reliable way? | Were confounding factors identified? | Were strategies to deal with confounding factors stated? | Were the groups/participants free of the outcome at the start of the study (or at the moment of exposure)? | Were the outcomes measured in a valid and reliable way? | Was the follow up time reported and sufficient to be long enough for outcomes to occur? | Was follow up complete, and if not, were the reasons to loss to follow up described and explored? | Were strategies to address incomplete follow up utilized? | Was appropriate statistical analysis used? |
|---------------------|---------------------------------------------------------------------|----------------------------------------------------------------------------------------------|--------------------------------------------------------|--------------------------------------|----------------------------------------------------------|------------------------------------------------------------------------------------------------------------|---------------------------------------------------------|-----------------------------------------------------------------------------------------|---------------------------------------------------------------------------------------------------|-----------------------------------------------------------|--------------------------------------------|
| Poonual et al.,2016 | Yes                                                                 | Yes                                                                                          | Yes                                                    | No                                   | NA                                                       | Yes                                                                                                        | Yes                                                     | Yes                                                                                     | Yes                                                                                               | No                                                        | Yes                                        |
| Sija et al.,2022    | Yes                                                                 | Yes                                                                                          | NA                                                     | No                                   | NA                                                       | Yes                                                                                                        | Yes                                                     | Yes                                                                                     | Yes                                                                                               | No                                                        | Yes                                        |
| Rahimi et al.,2018  | Yes                                                                 | Yes                                                                                          | Yes                                                    | No                                   | NA                                                       | Yes                                                                                                        | Yes                                                     | Yes                                                                                     | No                                                                                                | No                                                        | Yes                                        |
| Celik et al.,2016   | Yes                                                                 | Yes                                                                                          | Yes                                                    | No                                   | No                                                       | Yes                                                                                                        | Yes                                                     | Yes                                                                                     | Yes                                                                                               | Yes                                                       | Yes                                        |
| Tasci et al.,2010   | Yes                                                                 | Yes                                                                                          | Yes                                                    | No                                   | NA                                                       | Yes                                                                                                        | Yes                                                     | Yes                                                                                     | Yes                                                                                               | Yes                                                       | Yes                                        |
| Wang et al., 2019   | Yes                                                                 | Yes                                                                                          | Yes                                                    | No                                   | NA                                                       | Yes                                                                                                        | yes                                                     | Yes                                                                                     | Yes                                                                                               | Yes                                                       | Yes                                        |
| Kumar et al.,2017   | Yes                                                                 | Yes                                                                                          | Yes                                                    | No                                   | NA                                                       | Yes                                                                                                        | Yes                                                     | Yes                                                                                     | Yes                                                                                               | Yes                                                       | Yes                                        |
| Rai & Thakur 2013   | Yes                                                                 | Yes                                                                                          | Yes                                                    | No                                   | NA                                                       | Yes                                                                                                        | Yes                                                     | Yes                                                                                     | Yes                                                                                               | Yes                                                       | Yes                                        |
